# Supplementary material for: Coordination copolymerization monitoring of ethylene and alfa-olefins by in-line Raman spectroscopy
Source: Royal Society of Chemistry journal article supplement (doi:10.1039/d2ra05213j), 2022-01-01
Supplement: d2ra05213j1.pdf [file d2ra05213j1.pdf]

### Electronic Supplementary Information

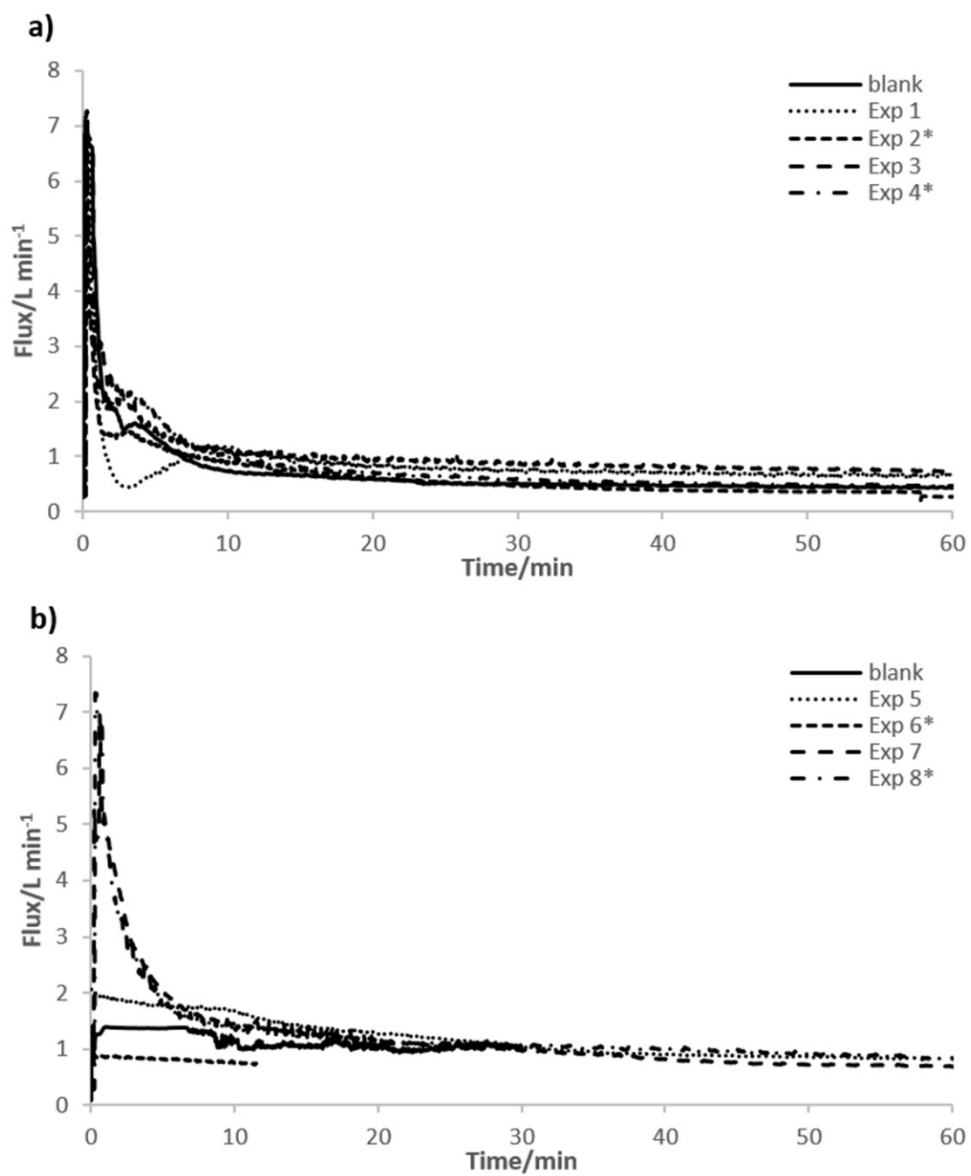

**Figure S1.** Polymerization profiles using a) metallocene and b) Ziegler-Natta catalyst

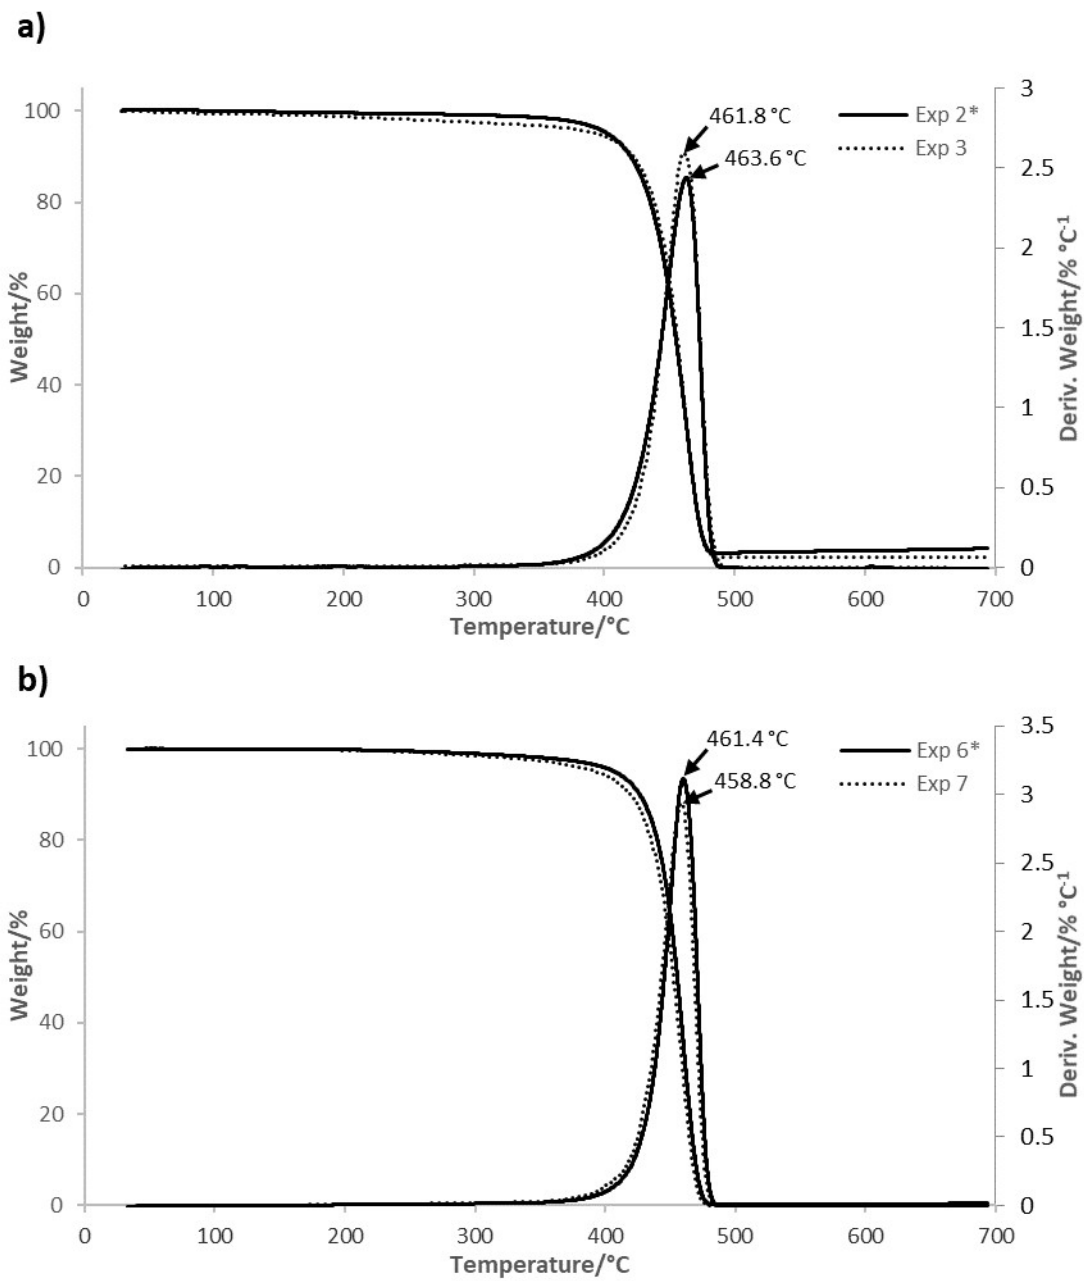

**Figure S2.** TGA thermograms of the copolymers obtained with a) metallocene and b)

Ziegler-Natta catalyst
